# Supplementary material for: Propuesta para la organización de un Archivo Municipal, Valle del Cauca, Cali (Colombia)
Source: JCI journal article supplement (doi:10.1172/jci25422), 2011-01-01
Supplement: sd1 [file 1]

**Supplementary Table 1.** Selected synovial antigens and sequences included on the synovial antigen array.

| <b>Antigen</b>         | <b>Sequence</b>                 |
|------------------------|---------------------------------|
| keratin-cit protein    |                                 |
| keratin-native protein |                                 |
| HCgp39 (76-91)         | ERSLSLLNCEEIKSQF                |
| cfc(Sigma)             | HQ[Cycl]HQESTXGRSRGR[Cycl]GRSGS |
| hFibB406-425 cit       | STYDXDNDGWLTSDPXKQCS            |
| hFibB106-125 cit       | CPTGCQLQEALLQQEXPIXN            |
| hFibB436-455           | RCHAANPNGRYYWGGQYTWD            |
| hFibB406-425           | STYDRDNDGWLTSDPRKQCS            |
| hFibB106-125           | CPTGCQLQEALLQQERPIRN            |
| hFibA346-365 cit       | NQNPGSPXPGSTGTWNPSS             |
| hFibA526-545           | SRGSEGGFFSPMLGEFVSETE           |
| hFibA346-365           | NQNPGSPRPGSTGTWNPSS             |
| hFibA46-65             | ACKDSDWPFCSEDEDWDWPFC           |
| vim406-425 cit         | GEESXISLPLPNFSSLNLXE            |
| vim361-380 cit         | TIGXLQDEIQNMKEEMAXHL            |
| vim271-290 cit         | DVXQQYESVAAKNLQEAEEW            |
| vim196-215 cit         | XEEAENTLQSFQDVNTLQS             |
| vim136-155 cit         | EQLKGQGKSXLGDLYEEEMX            |
| vim1-20 cit            | MSTXSVSSSSYXXMFGGPGT            |
| vim406-425             | GEESRISLPLPNFSSLNLRE            |

|                       |                      |
|-----------------------|----------------------|
| vim361-380            | TIGRLQDEIQNMKEEMARHL |
| vim271-290            | DVRQQYESVAAKNLQEAEW  |
| vim211-230            | DNASLARLDLERKVESLQEE |
| vim196-215            | REEAENTLQSFRQDVNTLQS |
| vim136-155            | EQLKGQGKSRLGDLYEEEMR |
| vim46-65              | PSTSRSLYASSPGGVYATRS |
| vim1-20               | MSTRSVSSSSYRRMFGGPGT |
| H2B/r 31-51           | AAHRKESYSIYVYKVLKQVH |
| ApoE 277-296 cit      | AXLKSWFEPLVEDMQXQWAG |
| Clusterin 416-435 cit | EQFNWVSXLANTQGEDQYY  |
| COMP468-487 cit       | CDDDDDNDGVPDSXDNCXLV |
| Clusterin 416-435     | EQFNWVSRLANTQGEDQYY  |
| Fibromodulin 320-339  | LQGNRINEFSISSFCTVVDV |
| COMP468-487           | CDDDDDNDGVPDSRDNCRLV |
| BiP2004 protein       |                      |
| vim191-200 cit        | DIMXLXEKLQEEMLQXEEAE |
| cf48-65               | TIHAHPGSRRGGRHGYHH   |

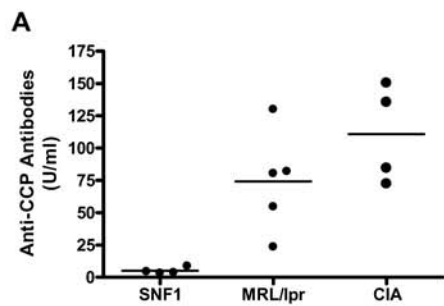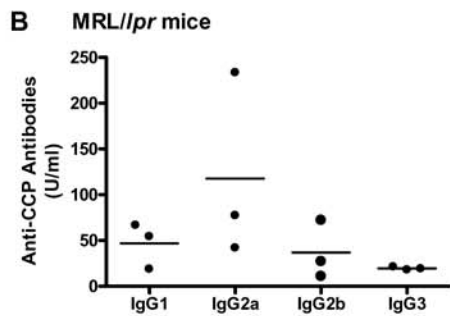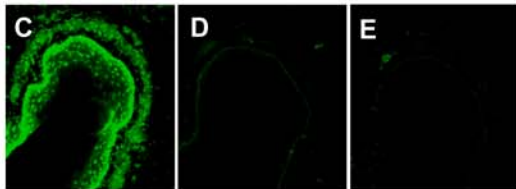

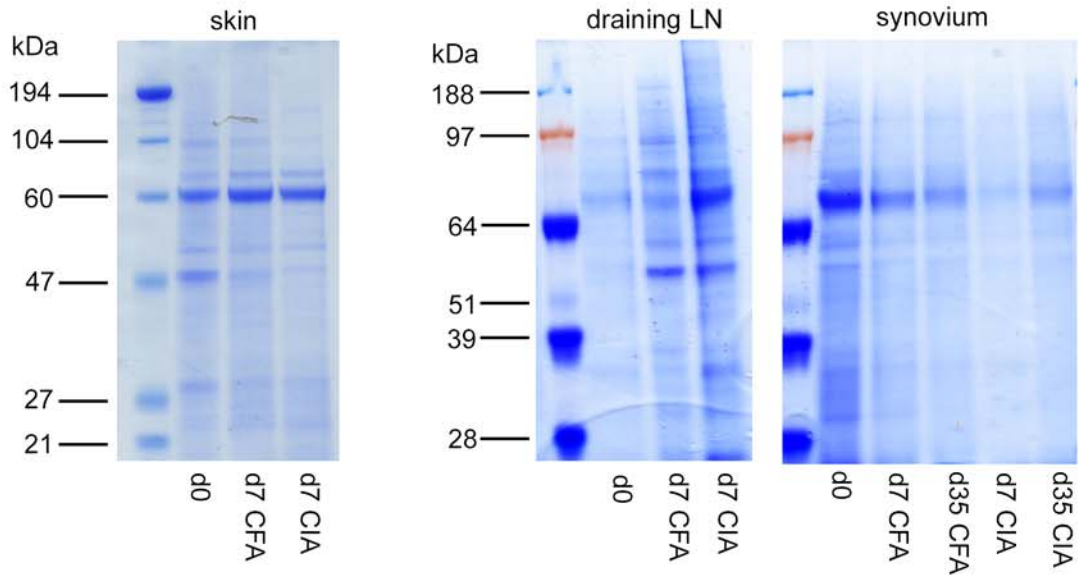

**Supplementary Figure 1.** Specific antibody reactivity to citrullinated proteins is restricted to CIA. (A) Sera from 4 month-old SNF1 (n = 4) and MRL/*lpr* (n=5) mouse models of lupus and from mice on day 35 after induction of CIA (n = 4) were tested for anti-CCP antibodies by ELISA. (B) Isotypes of the anti-CCP reactivity in MRL/*lpr* mice (n = 3) were tested by ELISA. Titers from individual mice are represented by circles and the average for the group expressed as a bar. (C-E) Sera from MRL/*lpr* mice was diluted in (C) PBS, (D) LRP, or (E) LXP and applied to sections of rat esophagus. Serum antibody binding was detected with FITC conjugated goat anti-mouse IgG. Sections are shown at 100X.

**Supplementary Figure 2.** Protein isolated from the skin, inguinal LN, and synovium of unimmunized mice, mice immunized with CFA, or mice with CIA at different timepoints. Protein was quantitated as described in Methods and 20  $\mu$ g was loaded onto 10% Bis-Tris gels. Gels were stained with coomassie blue and are shown.
